# Supplementary material
Source: Elsevier journal article supplement (https://rcastoragev2.blob.core.windows.net/82f75c1da98300fa45b3aed1e510d9f2/mmc1.pdf)
Supplement: mmc1 [file mmc1.pdf]

**Supplemental information**

**Obesity-associated hyperleptinemia  
alters the gliovascular interface  
of the hypothalamus to promote hypertension**

**Tim Gruber, Chenchen Pan, Raian E. Contreras, Tobias Wiedemann, Donald A. Morgan, Alicja A. Skowronski, Sandrine Lefort, Cahuê De Bernardis Murat, Ophelia Le Thuc, Beata Legutko, Francisco J. Ruiz-Ojeda, María de la Fuente-Fernández, Angel Luis García-Villalón, Daniel González-Hedström, Melanie Huber, Klara Szigeti-Buck, Timo D. Müller, Siegfried Ussar, Paul Pfluger, Steve C. Woods, Ali Ertürk, Charles A. LeDuc, Kamal Rahmouni, Miriam Granado, Tamas L. Horvath, Matthias H. Tschöp, and Cristina García-Cáceres**

**Supplemental information**

**Obesity-associated hyperleptinemia alters the gliovascular interface  
of the hypothalamus to promote hypertension**

**Tim Gruber, Chenchen Pan, Raian E. Contreras, Tobias Wiedemann, Donald A. Morgan, Alicja A. Skowronski, Sandrine Lefort, Cahuê De Bernardis Murat, Ophelia Le Thuc, Beata Legutko, Francisco J. Ruiz-Ojeda, María de la Fuente-Fernández, Angel Luis García-Villalón, Daniel González-Hedström, Melanie Huber, Klara Szigeti-Buck, Timo D. Müller, Siegfried Ussar, Paul Pfluger, Steve C. Woods, Ali Ertürk, Charles A. LeDuc, Kamal Rahmouni, Miriam Granado, Tamas L. Horvath, Matthias H. Tschöp, and Cristina García-Cáceres**



## Supplemental items

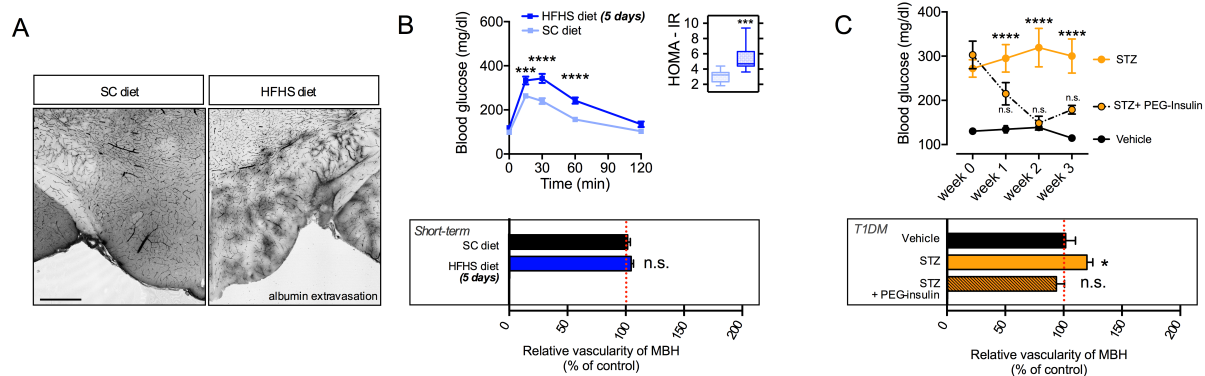

**Figure S1. Related to Figure 1: Impaired glucose metabolism does not underlie the dynamic remodelling of the hypothalamic vasculature.**

**(A)** Overview confocal micrograph of albumin extravasation in C57BL/6J mice exposed to SC or HFHS diet. Scale bar, 500  $\mu$ m.

**(B)** Blood glucose traces upon an intraperitoneal glucose tolerance test (2 g/kg BW glucose; *i.p.*) in C57BL/6J mice fed SC diet or 5-days HFHS diet (top left panel) and calculated HOMA-IR (top right panel); quantification of MBH vascularity in SC diet and 5-days HFHS diet-fed mice relative to SC diet control group. Data are presented as mean  $\pm$  SEM. \*\*\*  $P < 0.001$ , \*\*\*\*  $P < 0.0001$ , n.s., not significant.  $n = 10-12$  mice (two-way ANOVA and unpaired Student's *t*-test).

**(C)** Weekly *ad-libitum* blood glucose levels in C57BL/6J mice that received either STZ (50 mg/kg BW, *i.p.* over initial 5 days), STZ (50 mg/kg BW, *i.p.* over initial 5 days) + PEG-insulin (25 nmol/kg BW/day following STZ) or vehicle; quantification of MBH vascularity in STZ-treated, STZ + PEG-insulin-treated, and vehicle treated mice relative to vehicle-treated control mice. Diet and 5-days HFHS diet-fed mice relative to SC diet control group. Data are presented as mean  $\pm$  SEM. \*\*\*  $P < 0.001$ , \*\*\*\*  $P < 0.0001$ , n.s., not significant.  $n = 6$  mice (one-way ANOVA and two-way ANOVA).

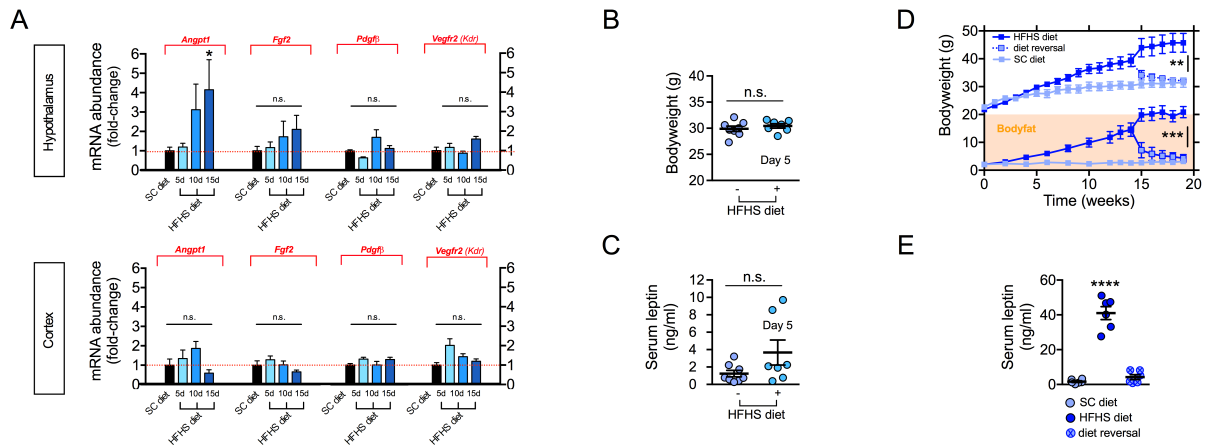

**Figure S2. Related to Figure 2: Time-course expression screen of HFHS diet-induced, pro-angiogenic factors in the mouse brain as well as bodyweight and serum leptin upon short- and long-term HFHS diet exposure.**

**(A)** qPCR analysis of pro-angiogenic genes angiopoietin 1 (*Angpt1*), fibroblast growth factor 2 (*Fgf2*), platelet-derived growth factor  $\beta$  (*Pdgfr*), vascular endothelial growth factor 2/kinase insert domain receptor (*Vegfr2/Kdr*) in the hypothalamus (top panel) and cortex (lower panel) of C57BL/6J mice exposed to HFHS diet for 5, 10 or 15 days normalized to SC-fed controls. Data are presented as mean  $\pm$  SEM. \*  $P < 0.05$ , n.s., not significant.  $n = 8$  mice (one-way ANOVA).

**(B)** Bodyweight of C57BL/6J mice exposed to 5 days HFHS diet versus SC diet. Data are presented as mean  $\pm$  SEM. n.s., not significant.  $n = 7-8$  mice (unpaired Student's  $t$ -test).

**(C)** Serum leptin levels of C57BL/6J mice exposed to 5 days HFHS diet versus SC diet. Data are presented as mean  $\pm$  SEM. n.s., not significant.  $n = 7-8$  mice (unpaired Student's  $t$ -test).

**(D)** Bodyweight and body fat trajectory of C57BL/6J mice fed SC diet (20 weeks), HFHS diet (20 weeks) or HFHS diet (15weeks) + reversal to SC diet (5 weeks). Data are presented as mean  $\pm$  SEM. \*\*  $P < 0.01$ , \*\*\*  $P < 0.001$ .  $n = 4$  mice (two-way ANOVA).

**(E)** Serum leptin levels of C57BL/6J mice fed SC diet (20 weeks), HFHS diet (20 weeks) or HFHS diet (15weeks) + reversal to SC diet (5 weeks). Data are presented as mean  $\pm$  SEM. \*\*\*\*  $P < 0.0001$ .  $n = 6$  mice (one-way ANOVA).

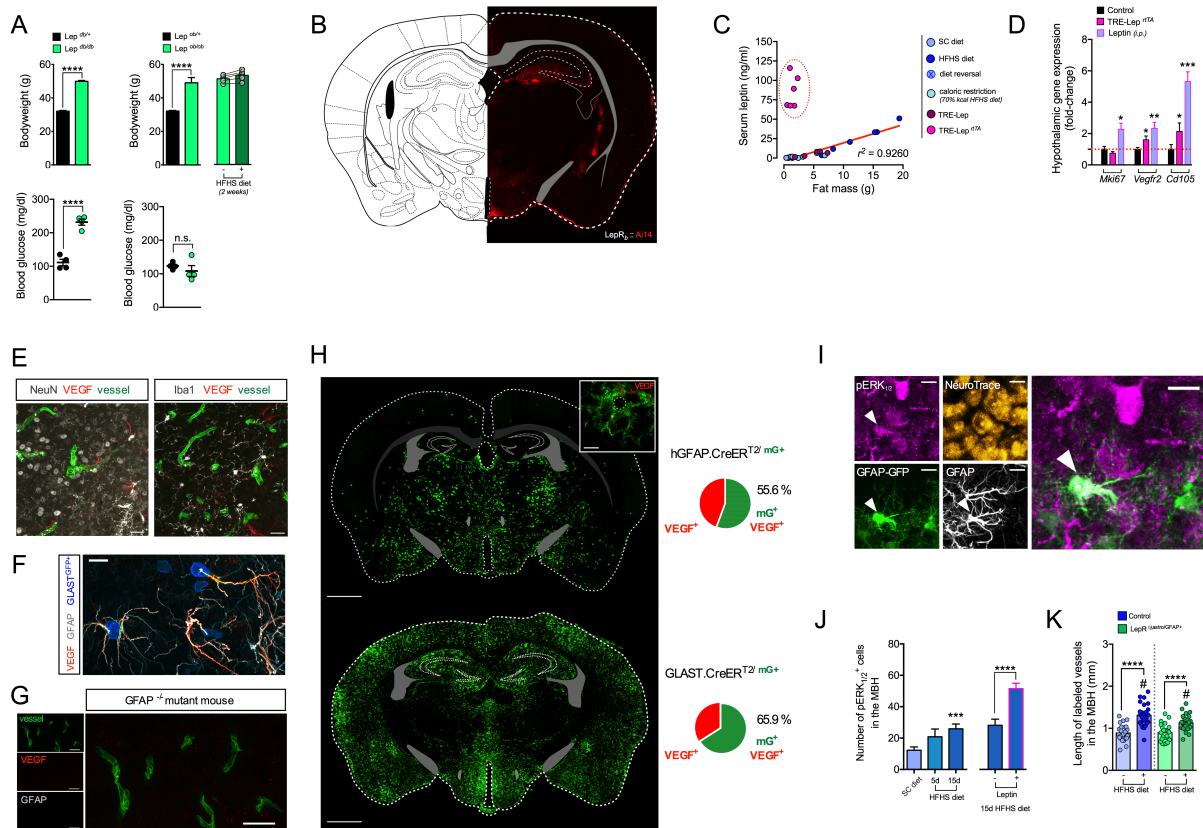

**Figure S3. Related to Figure 3: Bodyweight changes in  $Lep^{ob/ob}$  mice upon leptin substitution and the characterization of astrocyte-specific Cre-driver mouse models to target astroglial VEGF.**

(A) Bodyweight and glycemia of leptin receptor-deficient  $Lep^{db/db}$  and heterozygous  $Lep^{db/+}$  control mice fed SC diet (left panel) as well as of SC diet-fed leptin-deficient  $Lep^{ob/ob}$  and heterozygous  $Lep^{ob/+}$  control mice (right) including bodyweight change of a sub-cohort of  $Lep^{ob/ob}$  mice exposed to HFHS (2 weeks). Data are presented as mean  $\pm$  SEM. \*\*\*\*  $P < 0.0001$ .  $n = 4$  mice (unpaired Student's  $t$ -test).

(B) Schematic coronal diagram (Allen brain atlas) next to a confocal micrograph of  $LepRb: Ai14$  reporter mouse.

(C) Linear regression analysis of serum leptin levels and body fat across C57BL/6J mice fed SC diet, HFHS diet, diet reversal (HFHS > SC diet), calorie restriction (70 % of HFHS diet *ad libitum* intake) and TRE-Lep and TRE-Lep<sup>rtTA</sup> mice (doxycycline supplemented drinking water for 4 weeks); discordance of serum leptin and adiposity is highlighted for lean but hyperleptinemic TRE-Lep<sup>rtTA</sup> mice (red circle).

(D) Hypothalamic gene expression of marker of proliferation Ki67 (*Mki67*), vascular endothelial growth factor 2/kinase insert domain receptor (*Vegfr2/Kdr*) and cluster of differentiation 105 (*Cd105/endoglin*) as markers of endothelial proliferation in C57BL/6J mice fed SC diet treated with

leptin (3 mg/kg BW; *i.p.* twice a day for 3 days; see Figure 3B) and TRE-Lep<sup>rtTA</sup> mice (doxycycline supplemented drinking water for 4 weeks) relative to respective controls. Data are presented as mean  $\pm$  SEM. \*  $P < 0.05$ , \*\*  $P < 0.01$ , \*\*\*  $P < 0.001$ .  $n = 8-12$  mice (one-way ANOVA).

**(E)** Confocal micrographs showing the absence of VEGF immunoreactivity (red) in neurons (NeuN<sup>+</sup>; gray) and microglia (Iba1<sup>+</sup>; gray) along with the microvasculature (green) in the mediobasal hypothalamus (MBH) of C57BL/J6 exposed to a HFHS diet. Scale bar, 10  $\mu$ m.

**(F)** Exemplary confocal micrograph showing hypothalamic VEGF immunoreactivity (red) colocalizing with either GFAP-immunoreactive filaments (gray), GLAST.CreER<sup>T2+</sup> astrocytes tagged with tamoxifen-inducible nuclear GFP (blue), or both. Scale bar, 10  $\mu$ m.

**(G)** Confocal micrograph of hypothalamic VEGF (red) and GFAP (gray) immunoreactivity along with the microvasculature (green) of a global GFAP<sup>-/-</sup> mutant mouse. Scale bar, 25  $\mu$ m.

**(H)** Confocal micrographs of coronal brain sections of hGFAP.CreER<sup>T2/mG+</sup> (upper panel) and GLAST.CreER<sup>T2/mG+</sup> (lower panel) demonstrate characteristic Cre-recombination patterns of respective astrocyte-specific Cre-driver lines throughout the brain (mG<sup>+</sup>; green); illustrative high-magnification insert depicting an individual hypothalamic hGFAP.CreER<sup>T2/mG+</sup> astrocyte (green) exhibiting VEGF immunoreactivity (red). Pie chart analysis demonstrating the fraction of VEGF<sup>+</sup> astrocytes in the hypothalamus targeted by Cre-mediated recombination in hGFAP.CreER<sup>T2/mG+</sup> and GLAST.CreER<sup>T2/mG+</sup>, respectively.  $n = 3$  mice.

**(I)** Representative high-magnification confocal scans of phosphorylated extracellular regulated kinase  $\frac{1}{2}$  (pERK<sub>1/2</sub>) immunoreactivity colocalizing with neurons (NeuroTrace; yellow) but also astrocytes as identified by both AAV2/5Gfa2.GFP (GFAP-GFP; green) and GFAP immunoreactivity (grey). Scale bar, 10  $\mu$ m.

**(J)** Quantification of pERK<sub>1/2</sub>-immunoreactive cells in the MBH of male C57BL/6J mice fed SC diet, 5 or 15 days HFHS diet or 15 days HFHS diet with additional injection of leptin (5 mg/kg BW; *i.p.*) *versus* vehicle. Data are presented as mean  $\pm$  SEM. \*\*\*  $P < 0.001$  (one-way ANOVA), \*\*\*\*  $P < 0.0001$  (unpaired Student's *t*-test).  $n = 3-4$  mice.

**(K)** Quantification of total vessel length in the MBH of LepR<sup>iΔGFAP/+</sup> mice chronically fed SC or HFHS diet as compared to littermate controls. Data are presented as mean  $\pm$  SEM. \*\*\*  $P < 0.001$ , \*\*\*\*  $P < 0.0001$  (unpaired Student's *t*-test). #  $P < 0.05$  (one-way ANOVA).  $n = 3-4$  mice.

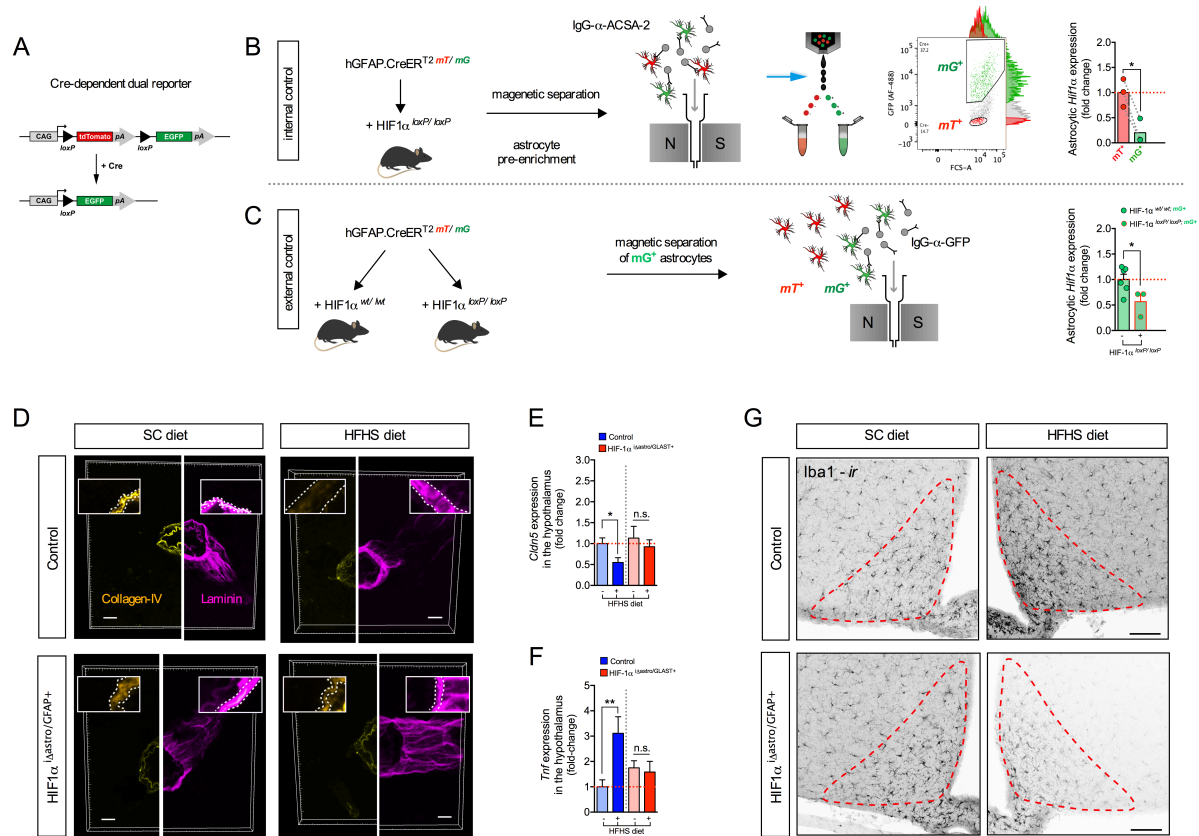

**Figure S4. Related to Figure 4: Validation of downregulation of HIF-1α in GFAP-expressing astrocytes in HIF1α<sup>AAV.Gfa2.iCre</sup> mice and its extended cerebrovascular effects *in vivo*.**

(A) Schematic diagram of the genomic organization of the a dual fluorescent Cre-dependent reporter mouse line ROSA<sup>mT/mG</sup> (*Gt(ROSA)26Sor<sup>tm4</sup>(ACTB-tdTomato,-EGFP)/Luo* /J).

(B) Schematic depiction of the workflow used to pre-enrich astrocytes from tamoxifen-injected HIF1α<sup>iΔGFAP mT/mG</sup> mice using magnetic-assisted cell sorting using the marker astrocyte-specific antigen 2 (ACSA2). Non-recombined (Cre<sup>-</sup>; mT<sup>+</sup>; red) and recombined (Cre<sup>+</sup>; mG<sup>+</sup>; green) astrocytes were immediately separated using FACS; representative FACS plot with the x-axis representing FSC-A and the y-axis representing GFP / Alexa Fluor 488 fluorescence; gating of mG<sup>+</sup> (green) and mT<sup>+</sup> (red) populations is indicated by encirclements. qPCR analysis using exon 2 specific HIF1α probes indicating marked reduction of transcripts in recombined (green) astrocytes relative to non-recombined (red) astrocytes. Data are presented as mean ± SEM. \* P < 0.05. n = 3 mice (unpaired Student's *t*-test).

(C) Schematic depiction of the workflow used to isolate recombinant, mG<sup>+</sup> astrocytes from tamoxifen-injected HIF1α<sup>iΔGFAP mT/mG</sup> mice (HIF1α<sup>loxP/loxP</sup>) and hGFAP.CreER<sup>T2/mG<sup>+</sup></sup> reporter mice by magnetic-assisted cell sorting *via* anti-GFP directed antibodies (IgG-α-GFP); qPCR analysis using exon 2 specific HIF-1α probes of HIF1α<sup>loxP/loxP</sup> mice as compared to HIF1α<sup>wt/wt</sup> mice. Data are presented as mean ± SEM. \* P < 0.05. n = 3-5 mice (unpaired Student's *t*-test).

(D) 3D-rendered confocal micrographs depicting HFHS-induced thickening of the vascular basement membrane as exemplified by collagen-IV (yellow) and laminin (magenta) in control littermates (upper panels) or HIF1 $\alpha$ <sup>iΔGFAP/+</sup> (lower panels) mice either fed with a SC or a HFHS diet. Images are representative of data in **Figure 4E**. Scale bar, 10  $\mu$ m.

(E) qPCR analysis of hypothalamic Claudin-5 (*Cldn5*) expression in HIF1 $\alpha$ <sup>iΔGLAST/+</sup> mice and wildtype littermates either fed with a SC or a HFHS diet relative to SC diet-fed wildtypes. Data are presented as mean  $\pm$  SEM. \*  $P < 0.05$ , n.s., not significant.  $n = 6-11$  mice (unpaired Student's  $t$ -test).

(F) qPCR analysis of hypothalamic Tumor-necrosis factor (*Tnf*) expression in HIF1 $\alpha$ <sup>iΔGLAST/+</sup> mice and wildtype littermates either fed with a SC or a HFHS diet relative to SC diet-fed wildtypes. Data are presented as mean  $\pm$  SEM. \*  $P < 0.05$ , n.s., not significant.  $n = 6-11$  mice (unpaired Student's  $t$ -test).

(G) Representative confocal micrographs illustrating the number of microglia immunoreactive for ionized calcium-binding adapter protein 1 (Iba1-ir) in control and HIF1 $\alpha$ <sup>iΔGFAP/+</sup> mice either fed with a SC or a HFHS diet. Images are representative of data in **Figure 4F**. Scale bar, 100  $\mu$ m.

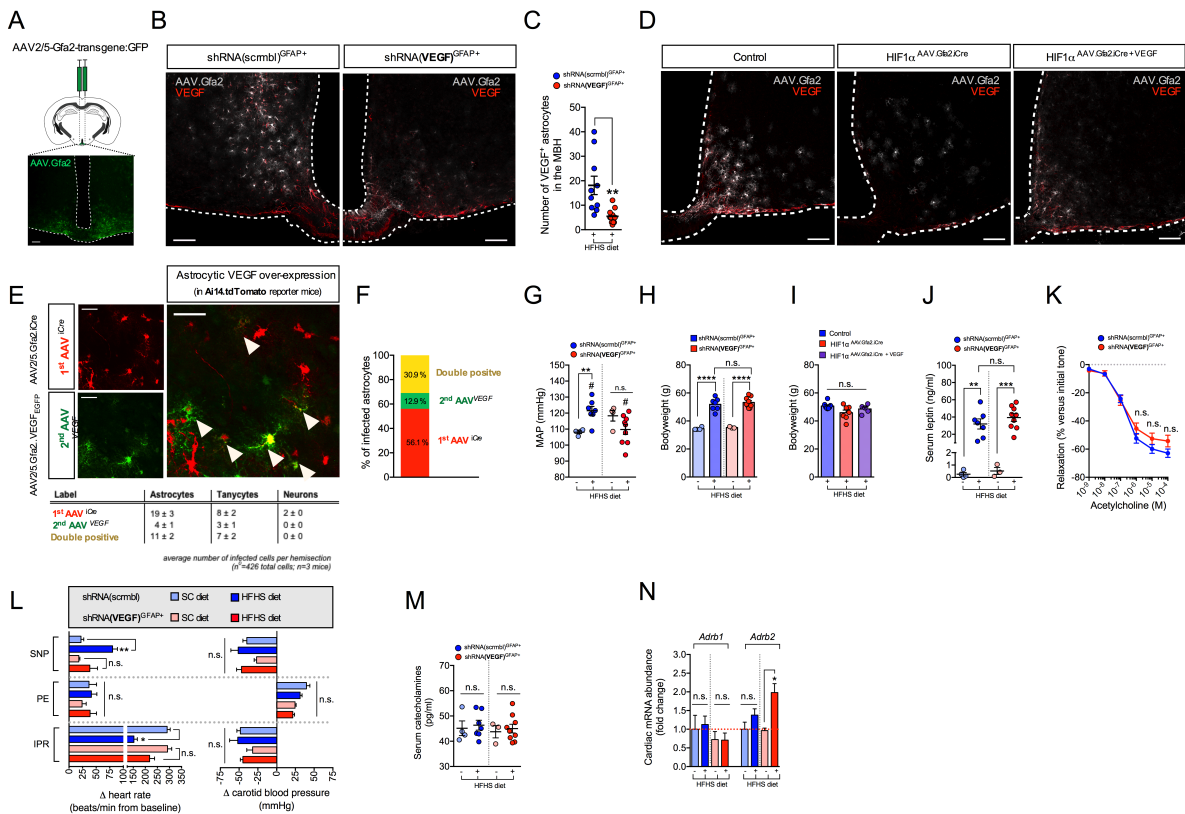

**Figure S5. Related Figure 5: Cardiovascular and cardiometabolic alterations induced by astroglial VEGF knock-down.**

(A) Schematic diagram of coronal brain section illustrating stereotaxic injections of AAV2/5 into the MBH of mice in order to drive transgene expression from the synthetic astrocyte-specific Gfa2<sub>(2.2kb)</sub> promoter. Representative confocal micrograph of AAV-targeted astrocytes within the MBH identified by viral GFP expression (AAV.Gfa2; green). Scale bar, 100  $\mu$ m.

(B) Representative confocal micrographs of HFHS-diet fed shRNA(scrambl)<sup>GFAP+</sup> and shRNA(VEGF)<sup>GFAP+</sup> mice showing VEGF immunoreactivity (red) along with virally expressed reporter protein (AAV.Gfa2; grey). Scans correspond to the same brain sections that are presented with regards to vascularity in **Figure 5B**. Scale bar, 100  $\mu$ m.

(C) Corresponding quantification of VEGF-ir cells in the MBH. Data are presented as mean  $\pm$  SEM. \*\* $p < 0.01$ .  $n = 3-5$  mice (unpaired Student's *t*-test).

(D) Representative confocal micrographs of control mice as compared to HIF1 $\alpha$ <sup>AAV.Gfa2.iCre</sup> and HIF1 $\alpha$ <sup>AAV.Gfa2.iCre + VEGF</sup> mice showing VEGF immunoreactivity (red) along with virally expressed reporter protein (AAV.Gfa2; grey). Scans correspond to the same brain sections that are presented with regards to vascularity in **Figure 5D**. Scale bar, 100  $\mu$ m.

(E) Characterization of dual virus approach in order to re-express VEGF in astrocytes otherwise devoid of HIF1 $\alpha$  (HIF1 $\alpha$ <sup>AAV.Gfa2.iCre + VEGF</sup> mice); both AAVs were mixed and simultaneously nanoinjected into the MBH of Cre-dependent Ai14.tdTomato reporter mice in order to visualize both Cre-recombined (red) as well as VEGF-overexpressing (green) cells; table below listing the absolute numbers of astrocyte, tanycytes and neurons per hemisection that were infected by either 1<sup>st</sup> AAV<sup>iCre</sup> (red), 2<sup>nd</sup> AAV<sup>VEGF</sup> (green) or both (yellow).  $n^0 = 426$  cells.  $n = 3$  mice. Scale bar, 25  $\mu$ m.

(F) Percentage of all infected astrocytes either single or double-infected astrocytes targeted by either 1<sup>st</sup> AAV<sup>iCre</sup> (red), 2<sup>nd</sup> AAV<sup>VEGF</sup> (green) or both (yellow).

(G) Mean arterial pressure of shRNA(scrambl)<sup>GFAP+</sup> and shRNA(VEGF)<sup>GFAP+</sup> mice fed either SC diet or HFHS diet as assessed by the tail cuff system assessed by repeated measures on separate days. Data are presented per individual mouse and mean  $\pm$  SEM. \*\*  $P < 0.01$ . n.s., not significant.  $n = 3-7$  mice (unpaired Student's *t*-test).

(H) Quantification of terminal bodyweights of shRNA(scrambl)<sup>GFAP+</sup> and shRNA(VEGF)<sup>GFAP+</sup> mice fed either SC diet or HFHS diet. Data are presented per individual mouse and mean  $\pm$  SEM. \*\*\*\*  $P < 0.0001$ .  $n = 3-7$  mice (unpaired Student's *t*-test).



**(I)** Quantification of terminal bodyweights of HFHS diet fed control mice, HIF-1 $\alpha$ <sup>AAV.Gfa2.iCre</sup> and HIF-1 $\alpha$ <sup>AAV.Gfa2.iCre + VEGF</sup> mice. Data are presented per individual mouse and mean  $\pm$  SEM. n.s., not significant. n = 7-8 mice (unpaired Student's *t*-test).

**(J)** Serum leptin levels of shRNA(scrambl)<sup>GFAP+</sup> and shRNA(VEGF)<sup>GFAP+</sup> mice fed either SC diet or HFHS diet. Data are presented as mean  $\pm$  SEM. \*\*  $P < 0.01$ , \*\*\*  $P < 0.001$ , n.s., not significant. n = 3-7 mice (unpaired Student's *t*-test).

**(K)** Quantification of dose-response curve of acetylcholine-induced endothelial relaxation of aortic ring segments of shRNA(scrambl)<sup>GFAP</sup> and shRNA(VEGF)<sup>GFAP+</sup> mice upon a HFHS diet feeding. Data is presented relative to initial tone and mean  $\pm$  SEM. n.s., not significant. n = 6-7 mice (unpaired Student's *t*-test).

**(L)** Quantification of relative changes in heart rate as well as carotid artery pressure are displayed upon *intracarotid* administration of sodium nitroprusside (SNP; 500  $\mu$ g/kg BW), phenylephrine (PE; 50  $\mu$ g/kg BW) and isoproterenol (IPR; 50  $\mu$ g/kg BW) in shRNA(scrambl)<sup>GFAP+</sup> and shRNA(VEGF)<sup>GFAP+</sup> mice fed either SC diet or HFHS diet. Data are presented relative to baseline and mean  $\pm$  SEM. \*  $P < 0.05$ , \*\*  $P < 0.01$  n = 3-7 mice; 2-3 aortic ring segments/mouse (two-way ANOVA).

**(M)** Quantification of circulating catecholamines in serum of shRNA(scrambl)<sup>GFAP+</sup> and shRNA(VEGF)<sup>GFAP+</sup> mice fed either SC diet or HFHS diet. Data are presented as mean  $\pm$  SEM. n.s., not significant. n = 3-7 mice (unpaired Student's *t*-test).

**(N)** qPCR analysis of the cardiac expression of  $\beta_1$ - and  $\beta_2$  adrenoreceptors (*Adrb1* and *Adrb2*, respectively) in shRNA(scrambl)<sup>GFAP+</sup> and shRNA(VEGF)<sup>GFAP+</sup> mice fed either SC diet or HFHS diet. Data are presented as mean  $\pm$  SEM. \*  $P < 0.05$ , n.s., not significant. n = 3-7 mice (unpaired Student's *t*-test).
